# Supplementary material
Source: PubMed Central journal article supplement (PMC7047951)
Supplement: NIHMS1529148-supplement-2.pdf [file NIHMS1529148-supplement-2.pdf]

**Supplementary Table 1 Constructs designed in this study**

| Construct name     | Residue range       | Sequence                                                                                                                                                                                                                                                                                                                                                                                                                                                                                                                                                                                   |
|--------------------|---------------------|--------------------------------------------------------------------------------------------------------------------------------------------------------------------------------------------------------------------------------------------------------------------------------------------------------------------------------------------------------------------------------------------------------------------------------------------------------------------------------------------------------------------------------------------------------------------------------------------|
| SUMO-TDP-43        | 1-414 (full length) | MGSSHHHHHHGSGLVPRGSASMSDSEVNQEAKPEVKPEVKPETHINL<br>KVSDGSSEIFFKIKKTTPLRRLMEAFKRQGKEMDSLRFYDGIQAD<br>QTPEDLDMEDNDIIEAHREQIGGMSEYIRVTEDENDIEIPESEDDGTV<br>LLSTVTAQFPGACGLRYRNPVVSQCMRGVRLVEGILHAPDAGWGNLV<br>YVVNYPKDNKRKMDDETDAASAVKVKRAVQKTSDLIVLGLPWKTTEQ<br>DLKEYFSTFGEVLMVQVKKDLKTGHSKGFGFVRFTEYETQVKVMSQ<br>RHMIDGRWCDCKLPNSKQSQDEPLRSRKVFVGRCTEDMTEDELREFF<br>SQYGDVMDVFIPKPFRAFAFVTFADDQIAQSLCGEDLIKGISVHISNA<br>EPKHNSNRQLERSGRFGGNPGGFGNQGGFGNSRGGGAGLGNNQGSN<br>MGGGMNFGAFSINPAMMAAAQAALQSSWGMMGLASQQNQSGPS<br>GNNQNQGNMQREPNAFGSGNSYSGSNSGAAIGWGSASNAGSGSG<br>FNGGFGSSMDSKSSGWGM |
| SUMO-SegA          | 311-360             | MGSSHHHHHHGSGLVPRGSASMSDSEVNQEAKPEVKPEVKPETHINL<br>KVSDGSSEIFFKIKKTTPLRRLMEAFKRQGKEMDSLRFYDGIQAD<br>QTPEDLDMEDNDIIEAHREQIGGMNFGAFSINPAMMAAAQAALQSSW<br>GMMGLASQQNQSGPSGNNQNQGNMQ                                                                                                                                                                                                                                                                                                                                                                                                           |
| SUMO-SegB          | 286-331             | MGSSHHHHHHGSGLVPRGSASMSDSEVNQEAKPEVKPEVKPETHINL<br>KVSDGSSEIFFKIKKTTPLRRLMEAFKRQGKEMDSLRFYDGIQAD<br>QTPEDLDMEDNDIIEAHREQIGGQGGFGNSRGGGAGLGNNQGSNMG<br>GGMNFGAFSINPAMMAAAQAALQ                                                                                                                                                                                                                                                                                                                                                                                                              |
| SUMO-SegB<br>A315E | 286-331             | MGSSHHHHHHGSGLVPRGSASMSDSEVNQEAKPEVKPEVKPETHINL<br>KVSDGSSEIFFKIKKTTPLRRLMEAFKRQGKEMDSLRFYDGIQAD<br>QTPEDLDMEDNDIIEAHREQIGGQGGFGNSRGGGAGLGNNQGSNMG<br>GGMNFGAFSINPAMMAAAQAALQ                                                                                                                                                                                                                                                                                                                                                                                                              |
| SUMO-SegAB         | 286-360             | MGSSHHHHHHGSGLVPRGSASMSDSEVNQEAKPEVKPEVKPETHINL<br>KVSDGSSEIFFKIKKTTPLRRLMEAFKRQGKEMDSLRFYDGIQAD<br>QTPEDLDMEDNDIIEAHREQIGGQGGFGNSRGGGAGLGNNQGSNMG<br>GGMNFGAFSINPAMMAAAQAALQSSWGMMGLASQQNQSGPSG<br>NQNQGNMQ                                                                                                                                                                                                                                                                                                                                                                               |

**Supplementary Table 2 Structural alignment details**

| Figure #                                          | Residues displayed                                                              | Residues aligned     | # atom pairs | r.m.s.d. |
|---------------------------------------------------|---------------------------------------------------------------------------------|----------------------|--------------|----------|
| Figure 2a&c                                       | SegA-sym 312-347 & SegA-asm long chain 312-352                                  | 312-336              | 161          | 1.344    |
| Figure 2f                                         | SegB A315E inner chain & outer chain                                            | 288-319              | 177          | 2.243    |
| Figure 2a & Supplementary Figure 5a bottom left   | SegA-sym 312-347 & SegA-asm short chain 311-346                                 | 336-346              | 70           | 1.150    |
| Figure 2a & Supplementary Figure 5a bottom middle | SegA-sym 312-347 & SegA-asm short chain 311-346                                 | 322-336              | 88           | 1.222    |
| Figure 2a & Supplementary Figure 5a bottom right  | SegA-sym 312-347 & SegA-slow 311-360                                            | 312-336              | 150          | 1.776    |
| Supplementary Figure 5c left                      | SegA-sym 328-333, 341'-346' & SegA-asm long chain 328-333, short chain 341-346  | 328-333              | 35           | 0.810    |
| Supplementary Figure 5c middle                    | SegA-sym 334-341 both chains & SegA-asm 334-341 both chains                     | (long chain) 334-341 | 45           | 0.873    |
| Supplementary Figure 5c right                     | SegA-sym 342-347, 327'-333' & SegA-asm long chain 342-352, short chain 327-333  | 342-347              | 44           | 1.568    |
| Supplementary Figure 5d                           | SegA-sym 328-336, 338'-347' & SegA-slow long chain 328-336, short chain 338-347 | 328-336              | 53           | 0.624    |
| Supplementary Figure 5e                           | SegA-sym 334-341 both chains & SegA-slow long chain 334-341                     | 336-340              | 27           | 0.948    |
| Supplementary Figure 5h (enlarged)                | SegA-sym (312-319) & SegB A315E inner chain (312-319)                           | 312-319              | 39           | 1.056    |
| Supplementary Figure 5h (enlarged)                | SegA-asm long chain (312-319) & SegB A315E inner chain (312-319)                | 312-319              | 43           | 1.463    |
| Supplementary Figure 5h (enlarged)                | SegA-asm short chain (312-319) & SegB A315E inner chain (312-319)               | 312-319              | 44           | 1.343    |
| Supplementary Figure 5h (enlarged)                | SegB outer chain (312-319) & SegB A315E inner chain (312-319)                   | 315-319              | 35           | 1.573    |

**Supplementary Table 3 Validation statistics of the hypothetical SegB A315E G304W model**

|                                   | SegB A315E G304W<br>(hypothetical model) |
|-----------------------------------|------------------------------------------|
| R.m.s.d. bonds (Å)                | 0.007                                    |
| R.m.s.d. angles (°)               | 0.574                                    |
| Molprobity clashscore, all atoms  | 16.61                                    |
| Molprobity score                  | 2.47                                     |
| Poor rotamers (%)                 | 0                                        |
| Ramachandran outliers (%)         | 0                                        |
| Ramachandran allowed (%)          | 21.8                                     |
| Ramachandran favoured (%)         | 79.2                                     |
| C $\beta$ deviations > 0.25 Å (%) | 0                                        |
| Bad bonds (%)                     | 0                                        |
| Bad angles (%)                    | 0                                        |
